# Supplementary material for: Effect of cooling rate on the formation pathway of medium-range FCC nanocrystals: the role of MRCO in structural evolution
Source: Royal Society of Chemistry journal article supplement (doi:10.1039/d5cp03039k), 2025-01-01
Supplement: d5cp03039k1.pdf [file d5cp03039k1.pdf]

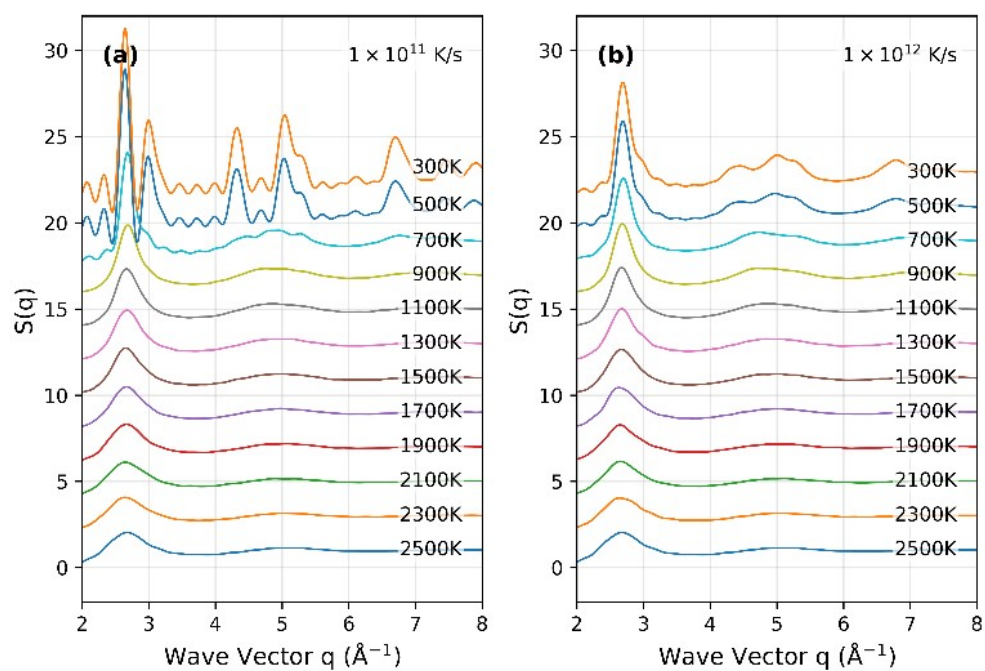

Figure S1.

Comparison of the evolution of the static structure factor  $S(q)$  of gold atoms with temperature. The curves are vertically offset for clarity to illustrate the changes in  $S(q)$  at different temperatures during cooling from 2500 K to 300 K. The corresponding temperature values are indicated at the right end of each curve. (a) Cooling rate of  $1 \times 10^{11}$  K/s; (b) Cooling rate of  $1 \times 10^{12}$  K/s.

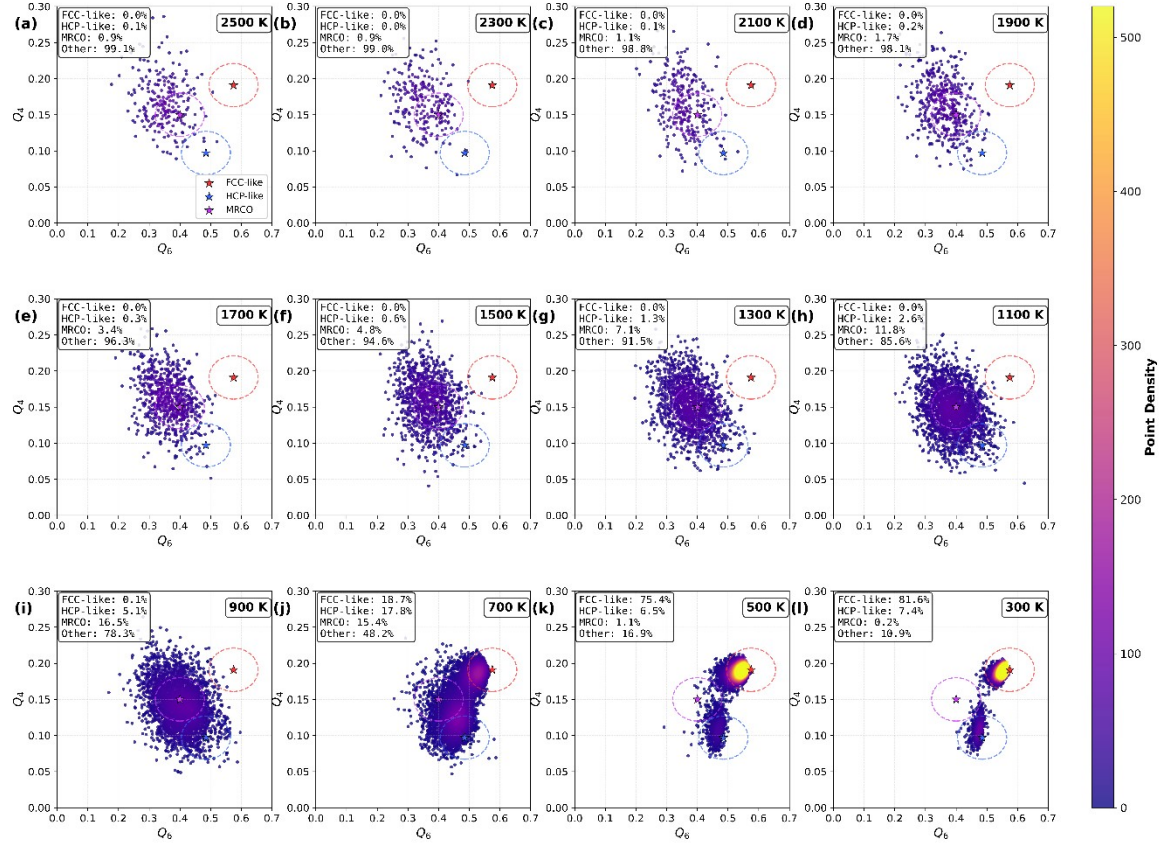

Figure S2a.

$Q_6$ – $Q_4$  distribution maps showing the evolution of local structural types in the system during cooling from 2500 K to 300 K at a cooling rate of  $1 \times 10^{11}$  K/s. The scatter plots are constructed based on the joint distribution of atomic local bond-orientational parameters  $Q_6$  and  $Q_4$ , with color indicating point density calculated by Gaussian kernel density estimation, with higher density representing more atoms with similar local structures. Asterisks mark the centers of standard crystalline structures: FCC-like ( $Q_6 = 0.575$ ,  $Q_4 = 0.191$ ), HCP-like ( $Q_6 = 0.485$ ,  $Q_4 = 0.097$ ), and the empirically defined MRCO region (around  $Q_6 \approx 0.4$ ,  $Q_4 \approx 0.15$ ). Dashed ellipses indicate the identification regions for each structure (tolerances of  $Q_6 \pm 0.08$  and  $Q_4 \pm 0.03$ ).

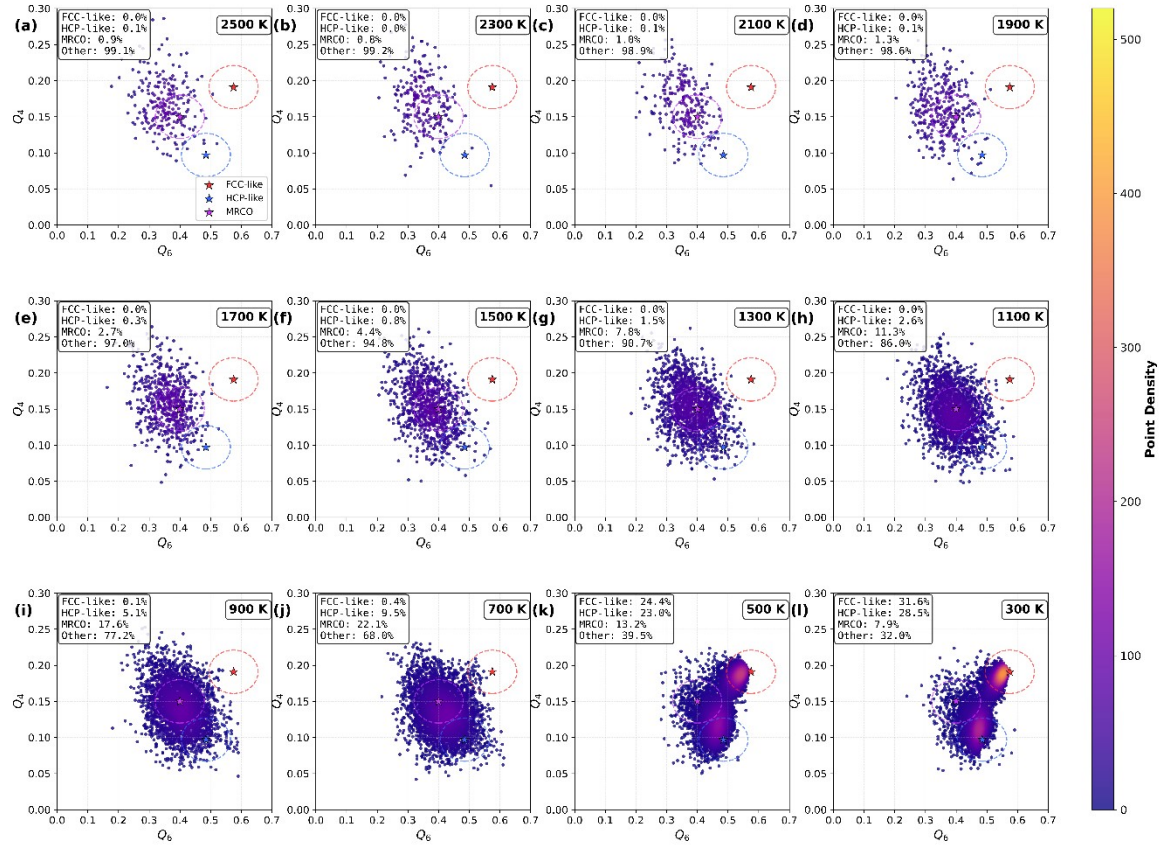

Figure S2b.

$Q_6$ – $Q_4$  distribution maps showing the evolution of local structural types in the system during cooling from 2500 K to 300 K at a cooling rate of  $1 \times 10^{12}$  K/s. The scatter plots are constructed based on the joint distribution of atomic local bond-orientational parameters  $Q_6$  and  $Q_4$ , with color indicating point density calculated by Gaussian kernel density estimation, with higher density representing more atoms with similar local structures. Asterisks mark the centers of standard crystalline structures: FCC-like ( $Q_6 = 0.575$ ,  $Q_4 = 0.191$ ), HCP-like ( $Q_6 = 0.485$ ,  $Q_4 = 0.097$ ), and the empirically defined MRCO region (around  $Q_6 \approx 0.4$ ,  $Q_4 \approx 0.15$ ). Dashed ellipses indicate the identification regions for each structure (tolerances of  $Q_6 \pm 0.08$  and  $Q_4 \pm 0.03$ ).

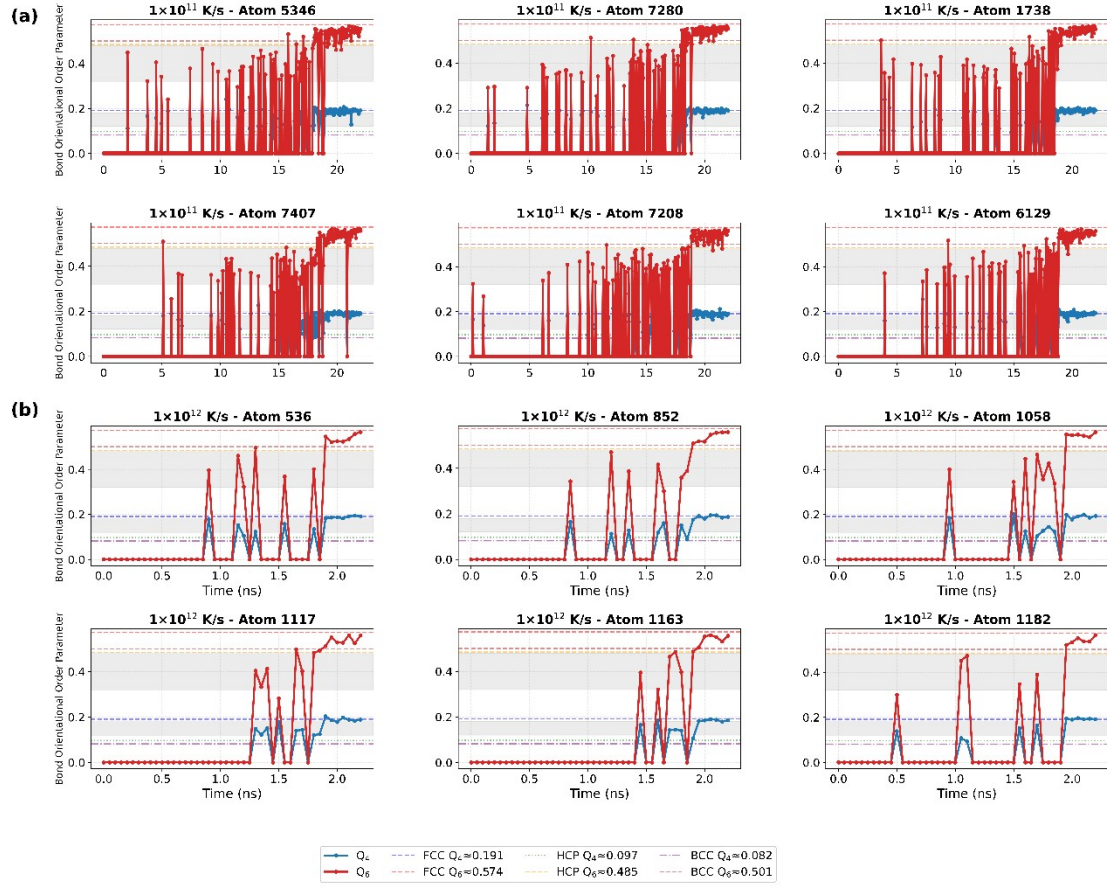

Figure S3

Evolution of bond order parameters of selected atoms under different cooling rates. (a) At a cooling rate of  $1 \times 10^{11}$  K/s, the  $Q_4$  and  $Q_6$  parameters of other representative atoms (ID: 5346, 7280, 1738, 7407, 7208, 6129) evolve over time during cooling from 2500 K to 300 K. (b) At a cooling rate of  $1 \times 10^{12}$  K/s, the corresponding evolution of other representative atoms (ID: 536, 852, 1058, 1117, 1163, 1182) during cooling from 2500 K to 300 K. The shaded regions (0.32–0.48 and 0.12–0.18) indicate the medium-range crystalline order (MRCO) region. Dashed and dash-dotted lines represent the reference values for FCC ( $Q_4 \approx 0.191$ ,  $Q_6 \approx 0.574$ ), HCP ( $Q_4 \approx 0.097$ ,  $Q_6 \approx 0.485$ ), and BCC ( $Q_4 \approx 0.082$ ,  $Q_6 \approx 0.501$ ) structures, respectively.

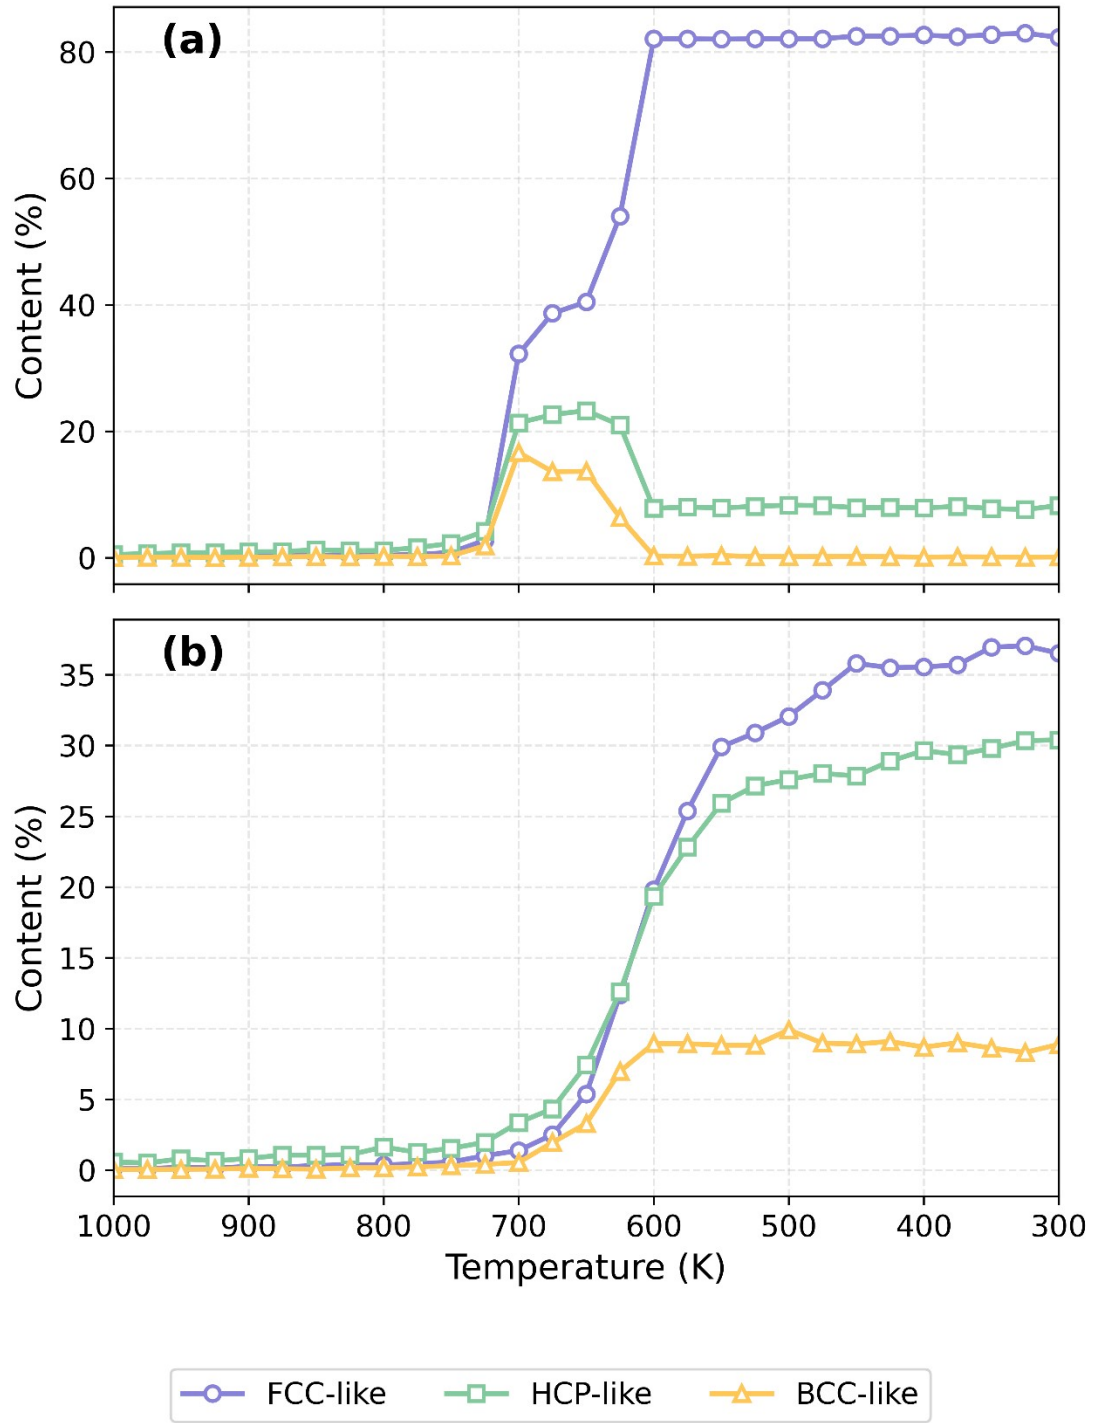

Figure S4.

Comparative plot of the temperature-dependent content of gold atom local structures based on PTM analysis (RMSD = 0.15), corresponding to cooling rates of (a)  $1 \times 10^{11}$  K/s and (b)  $1 \times 10^{12}$  K/s. Each curve represents the percentage of different structural types (FCC-like, HCP-like, BCC-like) as temperature decreases from 1000 K to 300 K. The figure reveals the competitive evolution of different local structures under different cooling rates.

Table S1. MRCO Residence Time Statistics at Cooling Rate of  $10^{11}$  K/s

| Atom ID       | MRCO Events    | Total Residence Time (ns) | Average Residence Time (ns) | Fraction of Total Time (%) |
|---------------|----------------|---------------------------|-----------------------------|----------------------------|
| 7476          | 29             | 1.7                       | 0.059                       | 7.7                        |
| 697           | 34             | 2.35                      | 0.069                       | 10.7                       |
| 4825          | 41             | 2.75                      | 0.067                       | 12.5                       |
| 7362          | 36             | 2.35                      | 0.065                       | 10.7                       |
| 5346          | 38             | 2.35                      | 0.062                       | 10.7                       |
| 7280          | 32             | 2.2                       | 0.069                       | 10                         |
| 1738          | 35             | 2.25                      | 0.064                       | 10.2                       |
| 7407          | 32             | 2.9                       | 0.091                       | 13.2                       |
| 7208          | 45             | 3.2                       | 0.071                       | 14.5                       |
| 6129          | 34             | 2.4                       | 0.071                       | 10.9                       |
| Mean $\pm$ SD | $35.6 \pm 4.8$ | $2.45 \pm 0.43$           | $0.069 \pm 0.009$           | $11.1 \pm 1.9$             |

Note: Total cooling time = 22 ns. Cooling rate:  $10^{11}$  K/s.

Table S2. MRCO Residence Time Statistics at Cooling Rate of  $10^{12}$  K/s

| Atom ID       | MRCO Events   | Total Residence Time (ns) | Average Residence Time (ns) | Fraction of Total Time (%) |
|---------------|---------------|---------------------------|-----------------------------|----------------------------|
| 368           | 2             | 0.1                       | 0.05                        | 4.5                        |
| 403           | 6             | 0.35                      | 0.058                       | 15.9                       |
| 441           | 6             | 0.45                      | 0.075                       | 20.5                       |
| 530           | 3             | 0.2                       | 0.067                       | 9.1                        |
| 536           | 5             | 0.3                       | 0.06                        | 13.6                       |
| 852           | 5             | 0.3                       | 0.06                        | 13.6                       |
| 1058          | 4             | 0.35                      | 0.088                       | 15.9                       |
| 1117          | 3             | 0.25                      | 0.083                       | 11.4                       |
| 1163          | 3             | 0.3                       | 0.1                         | 13.6                       |
| 1182          | 4             | 0.25                      | 0.063                       | 11.4                       |
| Mean $\pm$ SD | $4.1 \pm 1.4$ | $0.285 \pm 0.10$          | $0.070 \pm 0.016$           | $13.0 \pm 4.4$             |

Note: Total cooling time = 2.2 ns. Cooling rate:  $10^{12}$  K/s.
